# Supplementary material
Source: PubMed Central journal article supplement (PMC9713946)
Supplement: NIHMS1837260-supplement-1.pdf [file NIHMS1837260-supplement-1.pdf]

Supplemental Figure 1. Confounding variables, and methods used for their control, in the 16S microbiome literature on cardiometabolic phenotypes, 2009-2019 (n=71).

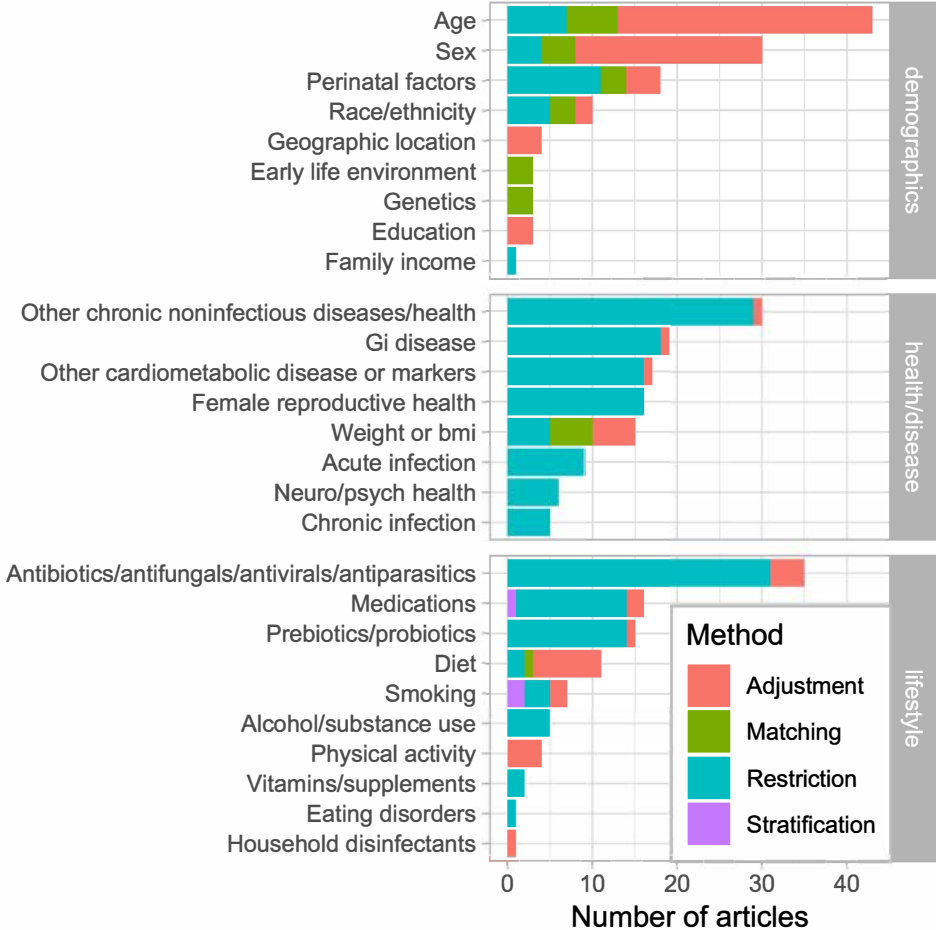

## Supplemental Figure 1

**Supplemental Table 1: Papers identified for Mini-Review of the Gut Microbiome and Metabolic Conditions and select characteristics**

| Reference                             | PMID     | Phenotype(s)                               | Study design        | Temporal ordering                     | Recruitment     | N     |
|---------------------------------------|----------|--------------------------------------------|---------------------|---------------------------------------|-----------------|-------|
| Aatsinki AK. et al. (2018)            | 29757063 | weight gain                                | longitudinal cohort | improper ordering                     | Clinical        | 46    |
| Al-Obaide MAI. et al. (2017)          | 28925931 | type 2 diabetes                            | case-control        | prevalent cases                       | Clinical        | 40    |
| Andoh A. et al. (2016)                | 27499582 | bmi                                        | case-control        | prevalent cases                       | Volunteer       | 20    |
| Angelakis E. et al. (2015)            | 26356733 | bmi                                        | cross-sectional     | ordering unclear b/c question unclear | Volunteer       | 10    |
| Bai J. et al. (2019)                  | 30417607 | bmi                                        | cross-sectional     | ordering unclear b/c question unclear | Volunteer       | 411   |
| Beaumont M. et al. (2016)             | 27666579 | abdominal adiposity                        | longitudinal cohort | ordering unclear (question clear)     | Volunteer       | 6,004 |
| ChÃ1vez-Carbajal A. et al. (2019)     | 30669548 | bmi, metabolic syndrome                    | cross-sectional     | ordering unclear b/c question unclear | Clinical        | 67    |
| Ciubotaru I. et al. (2015)            | 26209747 | type 2 diabetes                            | longitudinal cohort | improper ordering                     | Volunteer       | 115   |
| Crusell MKW. et al. (2018)            | 29764499 | gestational diabetes                       | longitudinal cohort | proper ordering                       | Clinical        | 213   |
| de la Cuesta-Zuluaga J. et al. (2018) | 29142244 | bmi, blood pressure, lipids, glucose, etc. | cross-sectional     | ordering unclear b/c question unclear | Unclear         | 441   |
| de la Cuesta-Zuluaga J. et al. (2018) | 30054529 | bmi, blood pressure, lipids, glucose, etc. | cross-sectional     | ordering unclear b/c question unclear | Unclear         | 441   |
| de la Cuesta-Zuluaga J. et al. (2018) | 30591685 | bmi, blood pressure                        | cross-sectional     | ordering unclear b/c question unclear | Unclear         | 441   |
| Del Chierico F. et al. (2018)         | 29922272 | bmi                                        | case-control        | prevalent cases                       | Volunteer       | 68    |
| Ferrocino I. et al. (2018)            | 30111822 | gestational diabetes                       | longitudinal cohort | ordering unclear b/c question unclear | Clinical        | 41    |
| Finucane MM. et al. (2014)            | 24416266 | bmi                                        | cross-sectional     | prevalent cases                       | Volunteer       | 217   |
| Fu J. et al. (2015)                   | 26358192 | bmi, lipids                                | cross-sectional     | prevalent cases                       | Clinical        | 893   |
| Gao R. et al. (2018)                  | 29280312 | bmi, lipids, glucose, insulin sensitivity  | cross-sectional     | ordering unclear b/c question unclear | Unclear         | 145   |
| Gao X. et al. (2018)                  | 29988340 | bmi                                        | cross-sectional     | ordering unclear (question clear)     | Unclear         | 551   |
| Gomez-Arango LF. et al. (2016)        | 27217482 | bmi, insulin, c-peptide, glucagon, etc.    | cross-sectional     | prevalent cases                       | Volunteer       | 70    |
| Gomez-Arango LF. et al. (2016)        | 27528065 | bmi, blood pressure                        | cross-sectional     | ordering unclear (question clear)     | Volunteer       | 205   |
| Goodrich JK. et al. (2014)            | 25417156 | bmi                                        | cross-sectional     | ordering unclear b/c question unclear | Volunteer       | 977   |
| Gozd-Barszczewska A. et al. (2017)    | 28954482 | bmi, lipids                                | case-control        | prevalent cases                       | Clinical        | 40    |
| He Y. et al. (2018)                   | 30249275 | bmi                                        | cross-sectional     | ordering unclear (question clear)     | Community-based | 6,896 |
| Hoel H. et al. (2018)                 | 29712976 | type 2 diabetes                            | case-control        | incident cases                        | Volunteer       | 84    |
| Houttu N. et al. (2018)               | 29338886 | bmi, lipids                                | cross-sectional     | incident cases                        | Volunteer       | 99    |
| Hsu CN. et al. (2018)                 | 30469463 | blood pressure, arterial stiffness         | cross-sectional     | prevalent cases                       | Clinical        | 86    |
| Hu HJ. et al. (2015)                  | 26230509 | bmi, lipids                                | case-control        | prevalent cases                       | Community-based | 134   |

|                                    |          |                                                         |                     |                                       |                  |       |
|------------------------------------|----------|---------------------------------------------------------|---------------------|---------------------------------------|------------------|-------|
| Huang Y. et al. (2018)             | 29733871 | type 1 diabetes                                         | case-control        | prevalent cases                       | Unclear          | 22    |
| Inoue R. et al. (2017)             | 29203964 | type 2 diabetes, hba1c, glucose                         | case-control        | prevalent cases                       | Clinical         | 22    |
| Jackson MA. et al. (2018)          | 29985401 | type 2 diabetes, hypertension, hypercholesterolemia     | longitudinal cohort | improper ordering                     | Volunteer        | 2,737 |
| Karvonen AM. et al. (2019)         | 30568265 | bmi                                                     | cross-sectional     | prevalent cases                       | Volunteer        | 502   |
| Kasai C. et al. (2015)             | 26261039 | bmi                                                     | cross-sectional     | prevalent cases                       | Clinical         | 10    |
| Kashtanova DA. et al. (2018)       | 30257444 | bmi, glucose, blood pressure, type 2 diabetes           | cross-sectional     | prevalent cases                       | Unclear          | 92    |
| Kelly TN. et al. (2016)            | 27507222 | glucose, blood pressure, lipids                         | case-control        | prevalent cases                       | Population-based | 112   |
| Koren O. et al. (2011)             | 20937873 | atherosclerosis                                         | case-control        | incident cases                        | Population-based | 30    |
| Kostic AD. et al. (2015)           | 25662751 | type 1 diabetes                                         | case-control        | incident cases                        | Clinical         | 33    |
| Lambeth SM. et al. (2015)          | 26756039 | type 2 diabetes, prediabetes                            | cross-sectional     | ordering unclear b/c question unclear | Clinical         | 49    |
| Larsen N. et al. (2010)            | 20140211 | type 2 diabetes                                         | case-control        | ordering unclear b/c question unclear | Clinical         | 20    |
| Le Roy CI. et al. (2018)           | 28767316 | bmi, visceral fat                                       | unclear             | ordering unclear (question clear)     | Volunteer        | 3,666 |
| Leiva-Gea I. et al. (2018)         | 30224347 | type 1 diabetes, maturity-onset diabetes in the young 2 | case-control        | prevalent cases                       | Unclear          | 43    |
| Lim MY. et al. (2017)              | 27053630 | metabolic syndrome                                      | cross-sectional     | prevalent cases                       | Community-based  | 655   |
| Lopez-Contreras BE. et al. (2018)  | 29388394 | bmi, lipids, insulin                                    | unclear             | prevalent cases                       | Volunteer        | 138   |
| Mendez-Salazar EO. et al. (2018)   | 30386323 | bmi                                                     | cross-sectional     | prevalent cases                       | Community-based  | 36    |
| Moreno-Indias I. et al. (2016)     | 28078038 | insulin resistance                                      | unclear             | prevalent cases                       | Clinical         | 10    |
| Moreno-Navarrete JM. et al. (2018) | 29105287 | subcutaneous and visceral adipose tissue browning       | cross-sectional     | prevalent cases                       | Clinical         | 34    |
| Morkl S. et al. (2017)             | 29131365 | bmi, adiposity, lipids                                  | case-control        | prevalent cases                       | Volunteer        | 106   |
| Murugesan S. et al. (2015)         | 25761741 | bmi, lipids                                             | cross-sectional     | prevalent cases                       | Community-based  | 190   |
| Naderpoor N. et al. (2019)         | 30987356 | bmi, adiposity, insulin                                 | cross-sectional     | prevalent cases                       | Volunteer        | 38    |
| Org E. et al. (2017)               | 28407784 | metabolic syndrome, glucose, lipids, insulin            | cross-sectional     | prevalent cases                       | Community-based  | 531   |
| Ottosson F. et al. (2018)          | 29409054 | bmi                                                     | cross-sectional     | prevalent cases                       | Community-based  | 674   |
| Peters BA. et al. (2018)           | 29950689 | bmi                                                     | cross-sectional     | prevalent cases                       | Clinical         | 599   |
| Pushpanathan P. et al. (2016)      | 27366720 | type 2 diabetes, hba1c                                  | case-control        | prevalent cases                       | Unclear          | 30    |
| Qi CJ. et al. (2016)               | 27231166 | type 1 diabetes, hba1c                                  | case-control        | incident cases                        | Clinical         | 30    |

|                                     |          |                                                  |                     |                 |                 |       |
|-------------------------------------|----------|--------------------------------------------------|---------------------|-----------------|-----------------|-------|
| Rampelli S. et al. (2018)           | 30534614 | weight gain                                      | longitudinal cohort | proper ordering | Community-based | 70    |
| Riva A. et al. (2017)               | 27450202 | bmi                                              | case-control        | prevalent cases | Unclear         | 78    |
| Salamon D. et al. (2018)            | 29657308 | type 2 diabetes, type 1 diabetes, hba1c, lipids  | case-control        | prevalent cases | Unclear         | 68    |
| Sanchez-Alcoholado L. et al. (2017) | 29051757 | type 2 diabetes                                  | case-control        | prevalent cases | Unclear         | 32    |
| Stanislawski MA. et al. (2018)      | 30352933 | bmi, weight gain                                 | longitudinal cohort | proper ordering | Unclear         | 165   |
| Stanislawski MA. et al. (2017)      | 28870230 | weight gain                                      | longitudinal cohort | proper ordering | Clinical        | 169   |
| Sun S. et al. (2019)                | 30905192 | hypertension, blood pressure                     | cross-sectional     | prevalent cases | Community-based | 529   |
| Tun HM. et al. (2018)               | 29459942 | bmi                                              | longitudinal cohort | proper ordering | Clinical        | 935   |
| Tun MH. et al. (2018)               | 30224442 | bmi                                              | longitudinal cohort | proper ordering | Clinical        | 757   |
| Turnbaugh PJ. et al. (2009)         | 19043404 | bmi                                              | unclear             | incident cases  | Unclear         | 100   |
| Villanueva-Millán MJ. et al. (2019) | 30924020 | metabolic syndrome                               | cross-sectional     | incident cases  | Clinical        | 51    |
| Wang Y. et al. (2017)               | 28328990 | type 2 diabetes                                  | case-control        | prevalent cases | Unclear         | 40    |
| Yamashita M. et al. (2019)          | 30901505 | insulin, glucose                                 | cross-sectional     | prevalent cases | Clinical        | 28    |
| Yang Q. et al. (2018)               | 29800124 | bmi, adiposity, insulin, lipids, type 2 diabetes | case-control        | incident cases  | Community-based | 5,933 |
| Yun Y. et al. (2017)                | 28676106 | bmi                                              | cross-sectional     | prevalent cases | Volunteer       | 1,463 |
| Zacarías MF. et al. (2018)          | 30005082 | bmi, weight gain                                 | longitudinal cohort | proper ordering | Volunteer       | 54    |
| Zhang X. et al. (2013)              | 24013136 | bmi, glucose, insulin, lipids, type 2 diabetes   | case-control        | incident cases  | Unclear         | 121   |
| Zupancic ML. et al. (2012)          | 22905200 | bmi, metabolic syndrome                          | cross-sectional     | prevalent cases | Community-based | 310   |

## Supplemental Table 1
